# Supplementary material for: Lysophosphatidic acid as a regulator of endometrial connective tissue growth factor and prostaglandin secretion during estrous cycle and endometrosis in the mare
Source: PubMed Central journal article supplement (PMC7499873; doi:10.1186/s12917-020-02562-6), 2020-09-17

## Supplementary data 1

**The effect of arachidonic acid (AA) at a dose 50 ng/ml on prostaglandin (PG)E<sub>2</sub> secretion in endometrial tissue at different stages of endometriosis.** The responsiveness of tissues was tested by their incubation for 24h with AA as a positive control. The measurement of PGE<sub>2</sub> was performed using prostaglandin E<sub>2</sub> EIA kit (Cayman Chemical Company; #514010).

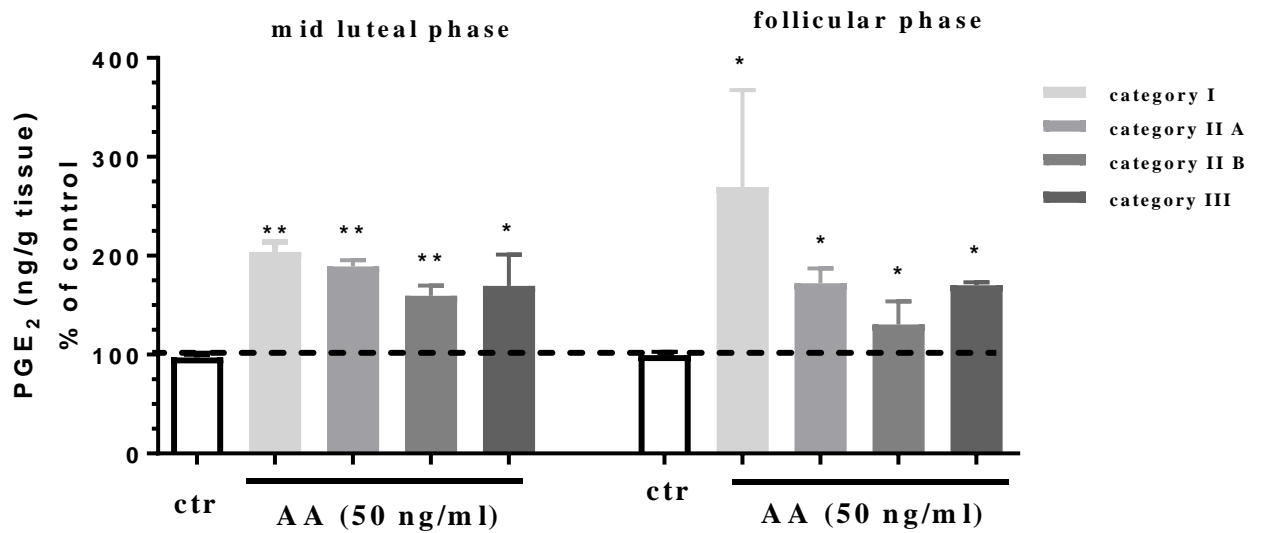

Supplement: 12917_2020_2562_MOESM2_ESM.pdf [file 12917_2020_2562_MOESM2_ESM.pdf]
